# Supplementary material for: Intrinsically chiral thermoresponsive assemblies from achiral clusters: enhanced luminescence and optical activity through tailor-made chiral additives
Source: PubMed Central journal article supplement (PMC11665439; doi:10.1039/d4sc07227h), 2024-12-17

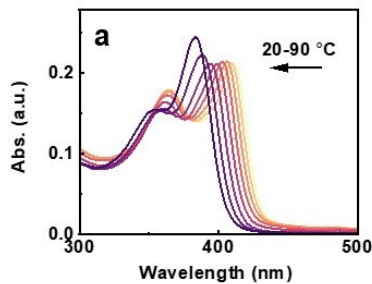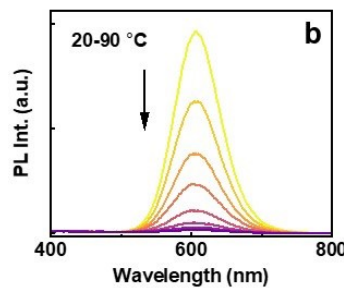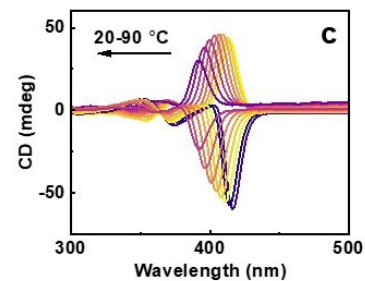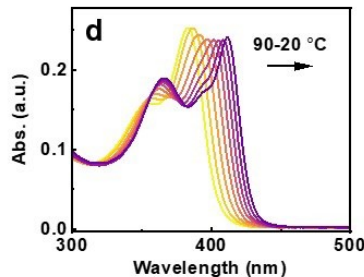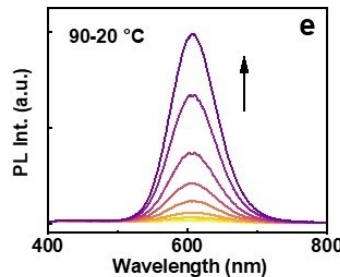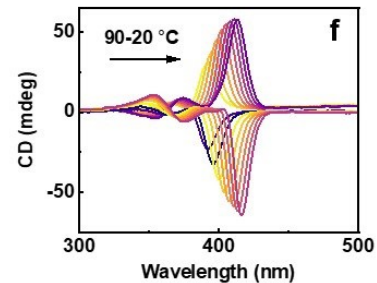

Supplement: SC-OLF-D4SC07227H-s001.pdf [file SC-OLF-D4SC07227H-s001.pdf]
